# Supplementary material for: Itaconic acid-enhanced robust ionic conductive elastomers for strain/pressure sensors
Source: Royal Society of Chemistry journal article supplement (doi:10.1039/d3tc03708h), 2023-01-01
Supplement: d3tc03708h5.pdf [file d3tc03708h5.pdf]

## Supporting Information

### **Itaconic acid-enhanced robust ionic conductive elastomers for strain/pressure sensors**

Wenjuan Xia, Yijia Yu, Chuanjiang Zhou, Wenjin Wang, Zhaoqiang Wu \*and Hong Chen

State and Local Joint Engineering Laboratory for Novel Functional Polymeric Materials, College of Chemistry, Chemical Engineering and Materials Science, Soochow University, Suzhou 215123, China

\*Corresponding author: E-mail: wzqwhu@suda.edu.cn (Z.Q. Wu); Tel: +86-512-65884279, Fax: +86-512-65880567

**Table S1 Detailed ratios for the preparation of ionically conductive elastomers**

| <b>Sample</b>         | <b>Molar ratio</b>              | <b>PEGDA</b>        | <b>Photo-initiator<br/>1173</b> |
|-----------------------|---------------------------------|---------------------|---------------------------------|
| <b>P(IA/AA/DMA)-1</b> |                                 |                     |                                 |
|                       |                                 |                     |                                 |
| <b>P(IA/AA/DMA)-2</b> | <b>(AA: ChCl: DMA=2:1:0.75)</b> |                     |                                 |
| <b>P(IA/AA/DMA)-3</b> |                                 |                     |                                 |
|                       |                                 | <b>0.5% to PDES</b> | <b>1% to PDES</b>               |
| <b>P(AA/DMA)</b>      | <b>AA: ChCl: DMA=2:1:0.75</b>   |                     |                                 |
| <b>P(IA/DMA)</b>      | <b>IA: ChCl: DMA=1:1:0.2</b>    |                     |                                 |
| <b>P(IA/AA)</b>       | <b>IA: AA: ChCl =10:1:6</b>     |                     |                                 |

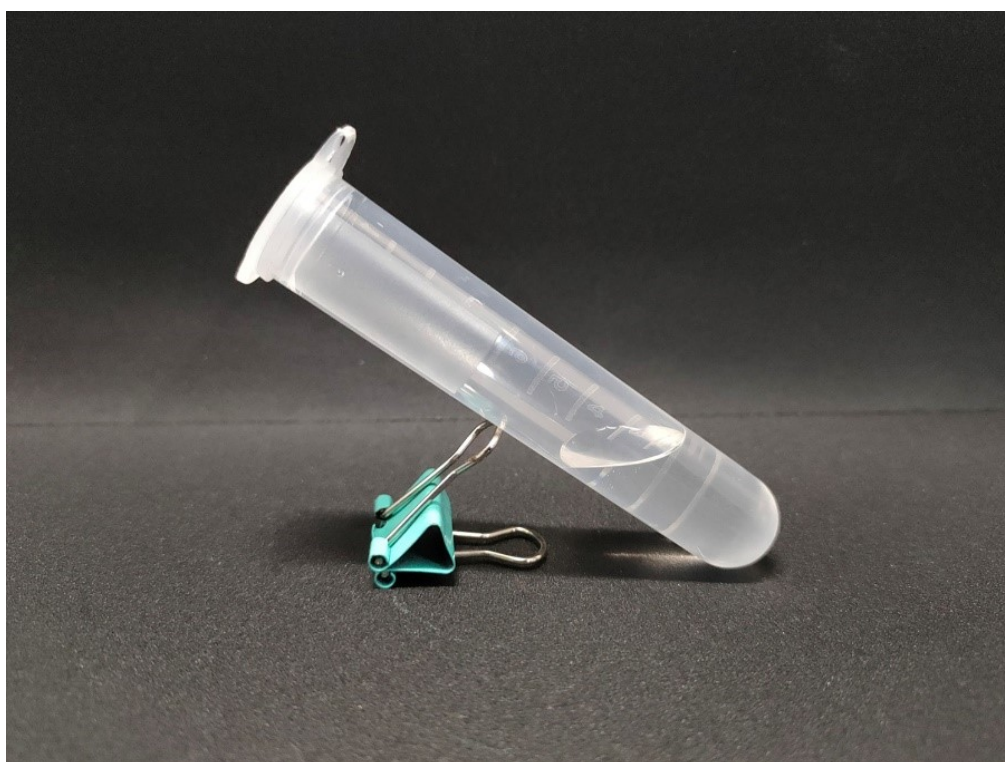

**Fig. S1 Optical photo of IA/AA/ChCl-type PDES.**

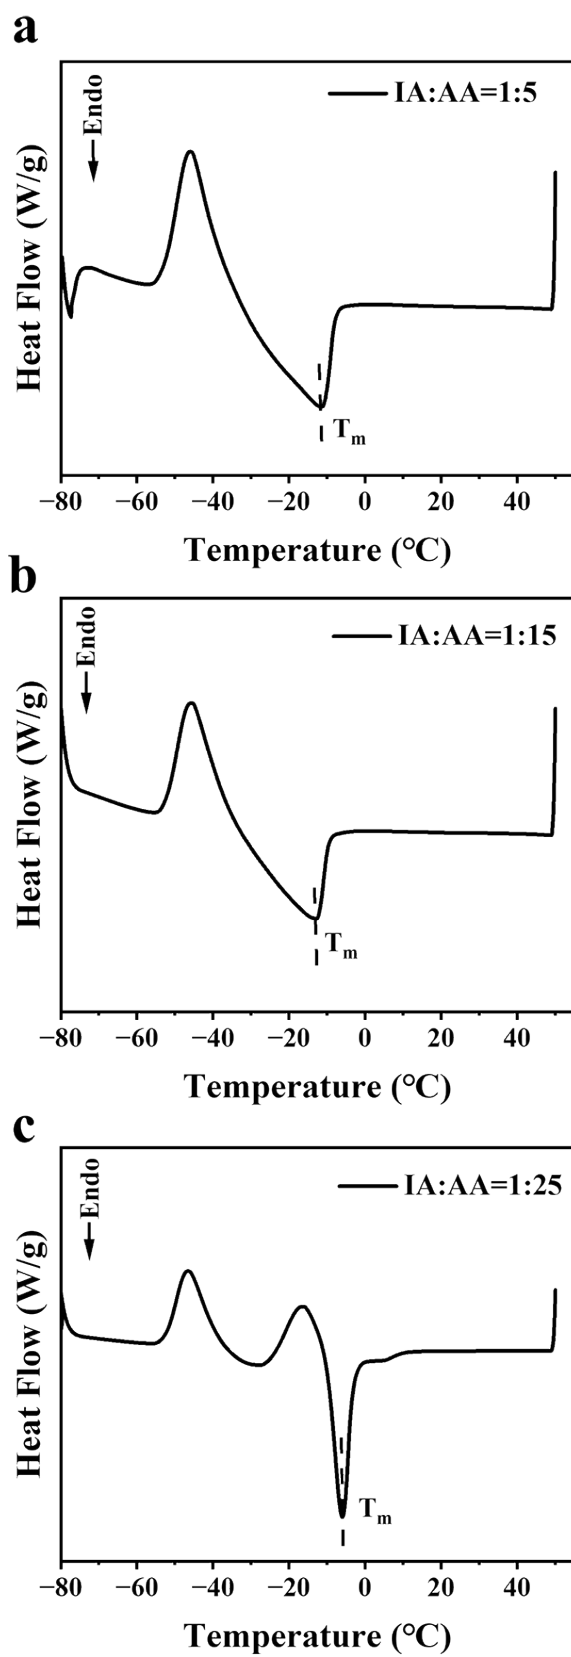

**Fig. S2** Differential scanning calorimetry (DSC) curves of IA/AA/ChCl-type PDES with different IA contents.

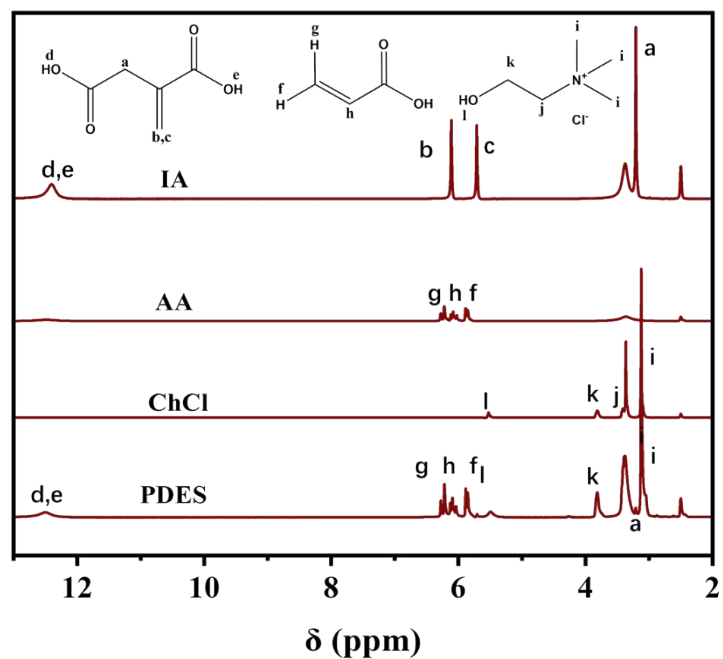

Fig. S3  $^1\text{H-NMR}$  spectra of IA, AA, ChCl and IA/AA/ChCl-type PDES (solvent DMSO- $d_6$ ).

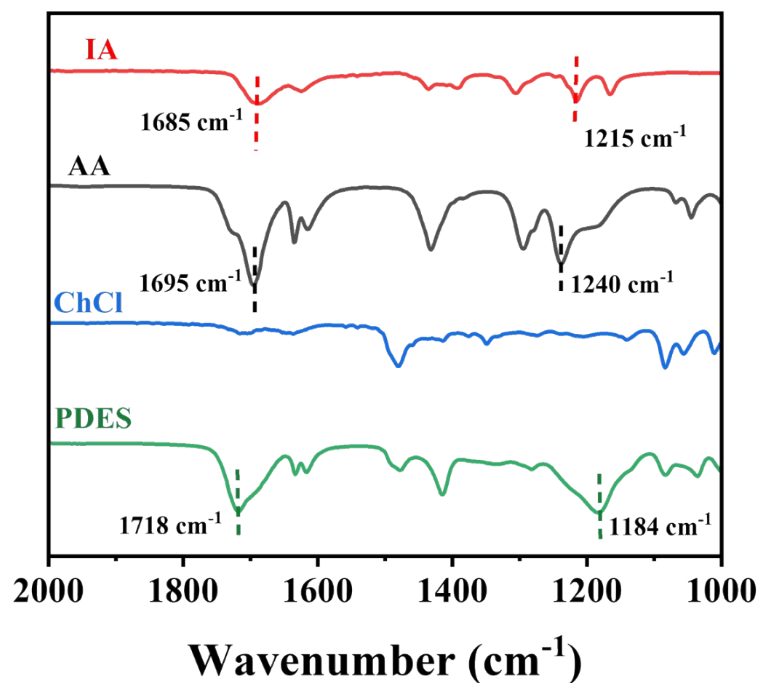

Fig. S4 FT-IR spectra of IA, AA, ChCl and IA/AA/ChCl-type PDES.

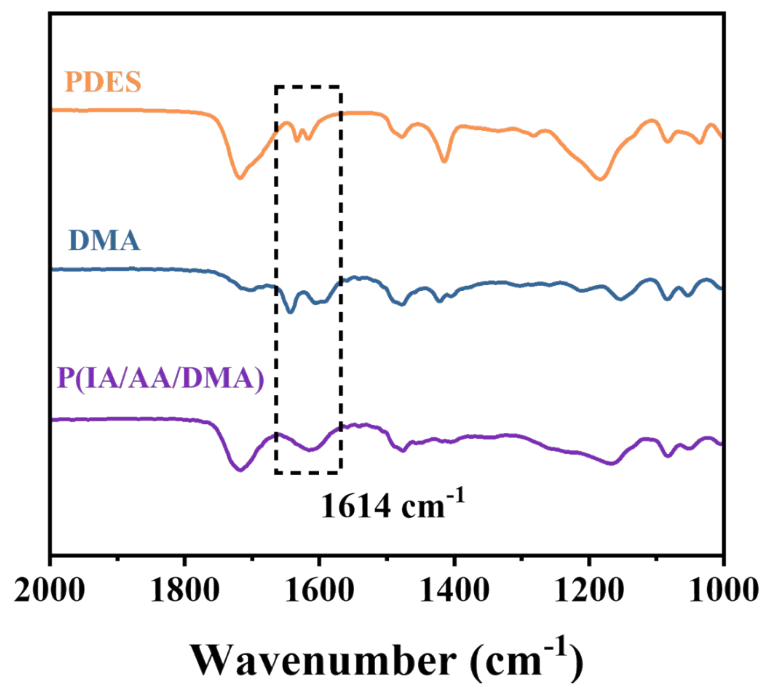

Fig. S5 FT-IR spectra of PDES, DMA and polymerized P (IA/AA/DMA) elastomers.

**a**

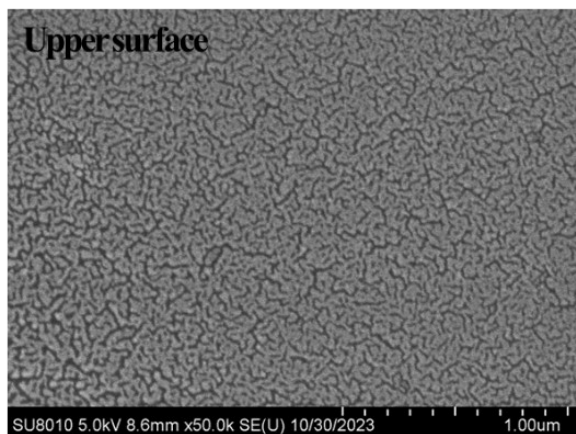

**b**

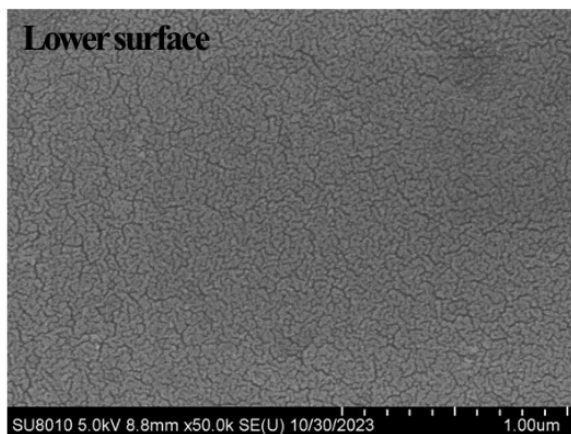

Fig. S6 SEM images of the P(IA/AA/DMA) elastomers.

**Table S2 Conductivity of some reported PDES-based ionic conductive elastomers**

| <b>Materials</b>  | <b>Conductivity(S/m)</b> | <b>Ref.</b> |
|-------------------|--------------------------|-------------|
| AA/MAH/ChCl-EAN   | 0.00963                  | [1]         |
| ChCl/urea/MCCM/AA | 0.00219                  | [2]         |
| ChCl/AA-AMPS      | 0.002                    | [3]         |
| ChCl/AA-IM        | 0.00032                  | [4]         |
| LA/ChCl-CNF-GMA   | 0.008                    | [5]         |
| AA/ChCl-TA-CNC    | 0.0042                   | [6]         |
| AAm/ChCl-MA/ChCl  | 0.013                    | [7]         |
| AA/ChCl-PAAM      | 0.021                    | [8]         |
| AA/ChCl-CMFs      | 0.09                     | [9]         |
| AA/ChCl-MXene     | 0.01                     | [10]        |
| P(IA/AA/DMA)      | 0.024                    | This work   |

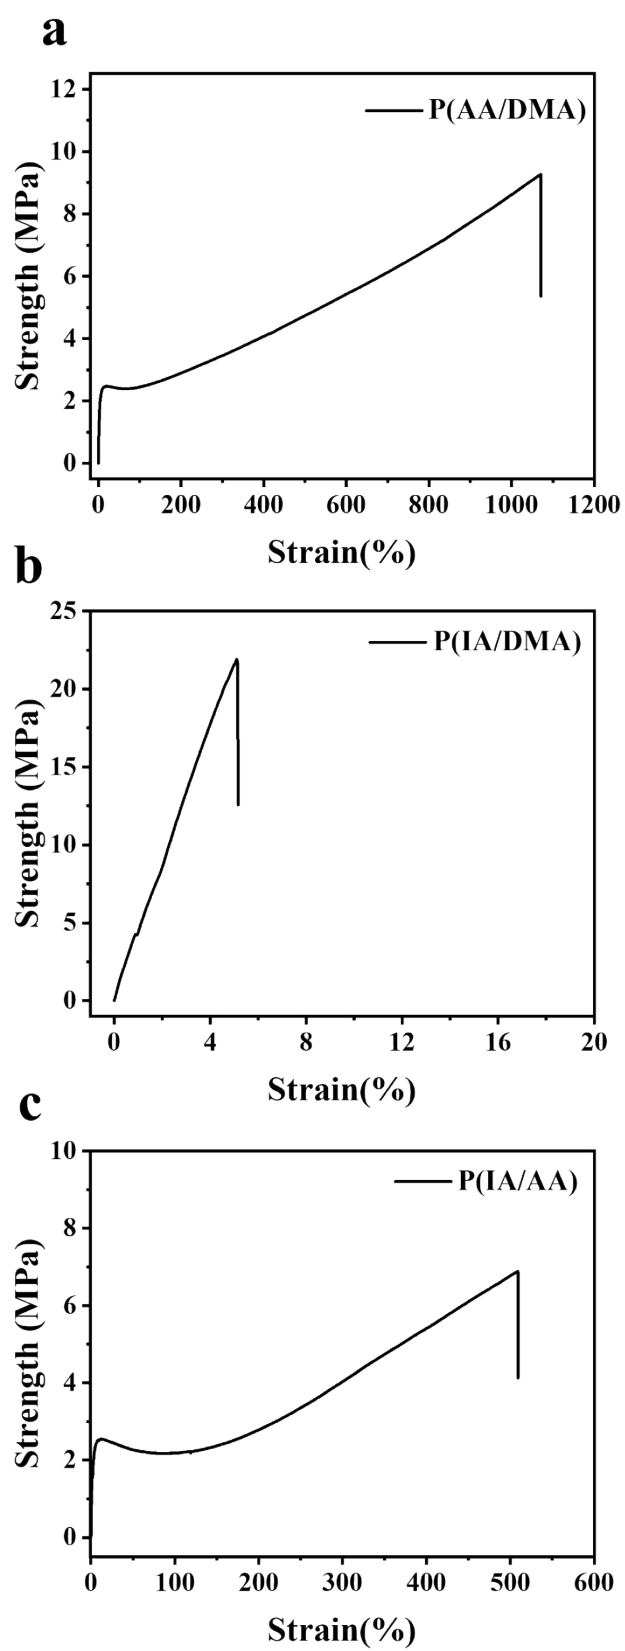

**Fig. S7** Stress–strain curves of the control groups: (a) P(AA/DMA) sample; (b) P(IA/DMA) sample; (c) P(IA/AA) samples.

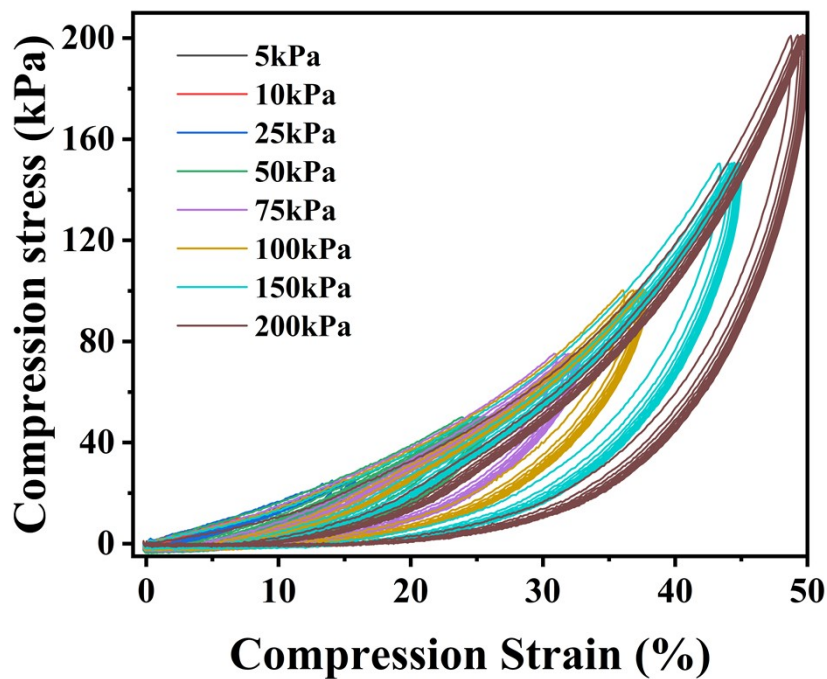

Fig. S8 Cyclic loading/unloading curves under different compressive stresses.

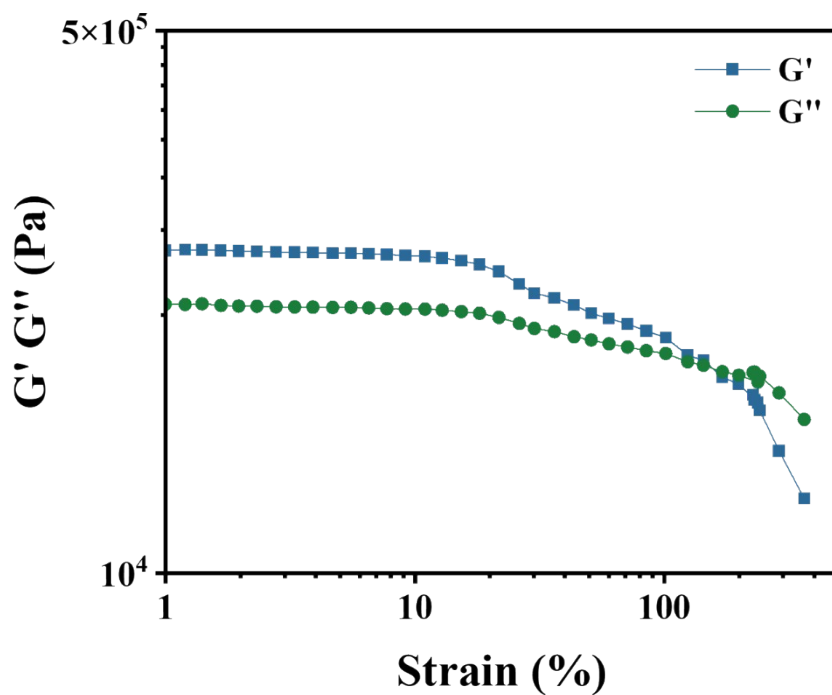

Fig. S9 Shear strain-scan rheological diagram of the P(IA/AA/DMA)-2 elastomer with a fixed angular frequency of 10 rad/s.



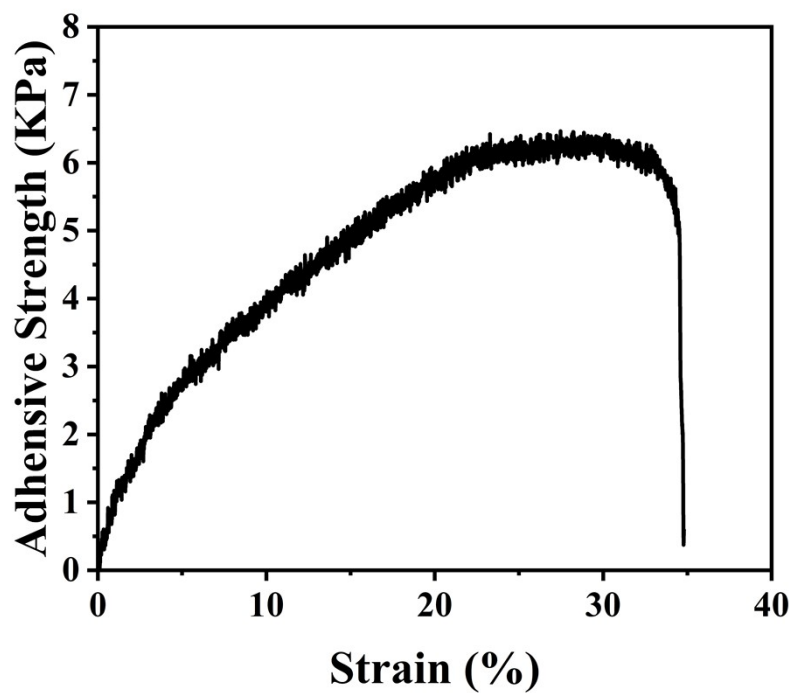

Fig. S10 Adhesion strength–strain curves of elastomers on skin ( $1.2 \times 1.2 \times 0.1$  cm<sup>3</sup>).

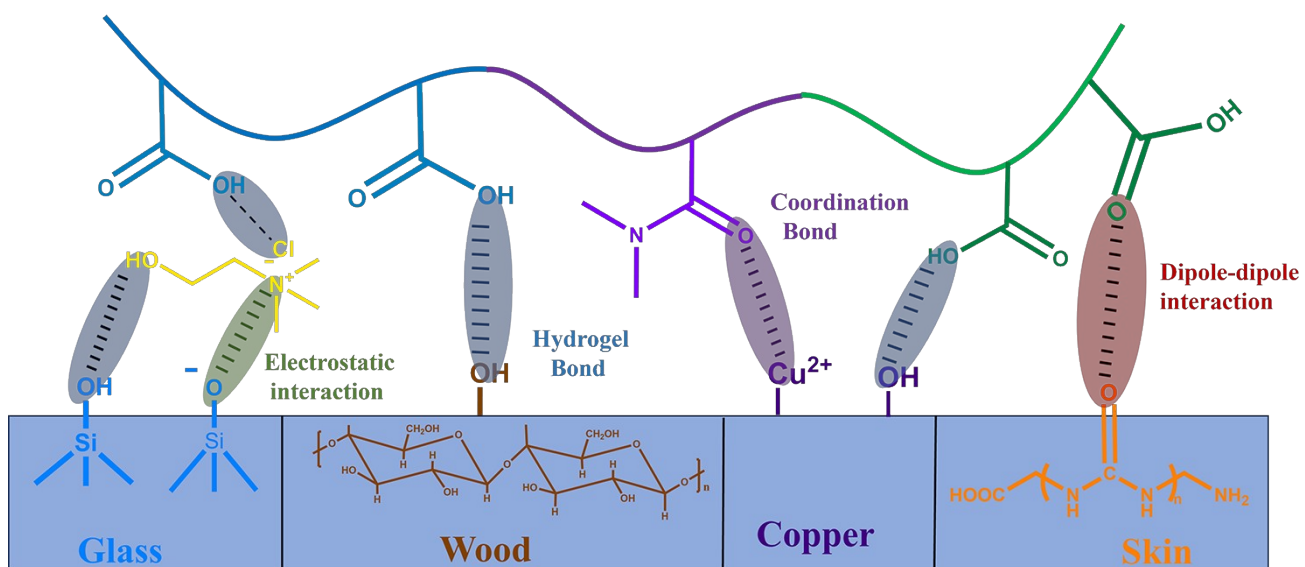

Fig. S11 Schematic diagram of the adhesion mechanism of the P(IA/AA/DMA)-2 elastomer.

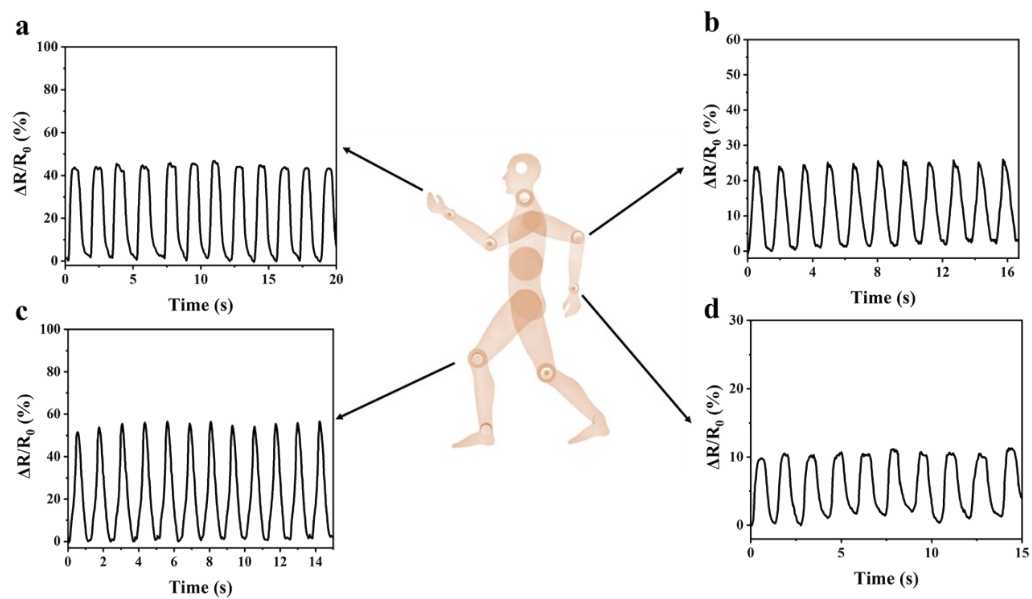

**Fig. S12 P(IA/AA/DMA)-2 as strain sensors for monitoring electrical signals during movement of different body parts: (a) finger bending and straightener movements; (b) elbow movement; (c) knee exercises; (d) wrist exercises.**

# Reference

- 1 N. Wang, X. Yang and X. Zhang, *Nat. Commun.*, 2023, **14**, 814.
- 2 W. Xia, L. Wang, Y. Yu, W. Wang, Z. Wu and H. Chen, *Soft Matter*, 2023, **19**, 3925-3932.
- 3 P. Sang, R. a. Li, K. Zhang, G. Chen, K. Zhao and M. He, *ACS Appl. Polym. Mater.*, 2022, **4**, 3543-3551.
- 4 D. Du, J. Zhou, D. Shi, W. Dong and M. Chen, *ACS Appl. Polym. Mater.*, 2022, **4**, 4972-4979.
- 5 S. Wang, L. Zhang, R. Ma, J. Yu, X. Zhang, C. Shi, L. Ma, T. Li, Y. Huang, Y. Hu, Y. Fan and Z. Wang, *Chem. Eng. J.*, 2023, **454**, 140022.
- 6 Y. Wang, J. Wang, Z. Ma and L. Yan, *ACS Appl. Mater. Interfaces*, 2021, **13**, 54409-54416.
- 7 X. Li, J. Liu, Q. Guo, X. Zhang and M. Tian, *Small*, 2022, **18**, e2201012.
- 8 R. Wang, Y. Ma, P. Chen, L. Sun, Y. Liu and C. Gao, *Colloids Surf., A*, 2023, **656**, 130349.
- 9 X. Sun, Y. Zhu, J. Zhu, K. Le, P. Servati and F. Jiang, *Adv. Funct. Mater.*, 2022, **32**, 2202533.
- 10 H. Yuan, P. Li, X. Wang, C. Yu, X. Wang and J. Sun, *J. Mater. Chem. C*, 2023, **11**, 13874-13885.
